# Supplementary material for: Highly efficient CO2capture with simultaneous iron and CaO recycling for the iron and steel industry
Source: Royal Society of Chemistry journal article supplement (doi:10.1039/c6gc00400h), 2016-01-01
Supplement: c6gc00400h1.pdf [file c6gc00400h1.pdf]

## Electronic supplementary information

**Table S1** Elemental composition (wt%) of freshly calcined CO<sub>2</sub> sorbents as determined by X-ray fluorescence analyzer (XRF-1800, Shimadzu, Japan)

| Material     | CaO  | MgO | Fe <sub>2</sub> O <sub>3</sub> | MnO | SiO <sub>2</sub> | Al <sub>2</sub> O <sub>3</sub> | Others |
|--------------|------|-----|--------------------------------|-----|------------------|--------------------------------|--------|
| 1M-0.5h-1:10 | 90.7 | 4.9 | 1.4                            | 1.2 | 0.4              | 0.2                            | 1.2    |
| 1M-2h-1:10   | 90.1 | 6.2 | 1.1                            | 1.3 | 0.1              | 0.1                            | 1.1    |
| 2M-0.5h-1:5  | 89.8 | 5.5 | 1.9                            | 1.3 | 0.2              | 0.2                            | 1.1    |
| 2M-2h-1:5    | 89.1 | 6.3 | 1.8                            | 1.3 | 0.1              | 0.1                            | 1.3    |
| 3M-2h-1:10   | 69.1 | 7.3 | 8.4                            | 1.3 | 5.0              | 6.2                            | 2.7    |
| 5M-2h-1:10   | 64.2 | 9.8 | 8.1                            | 1.3 | 7.1              | 7.2                            | 2.3    |

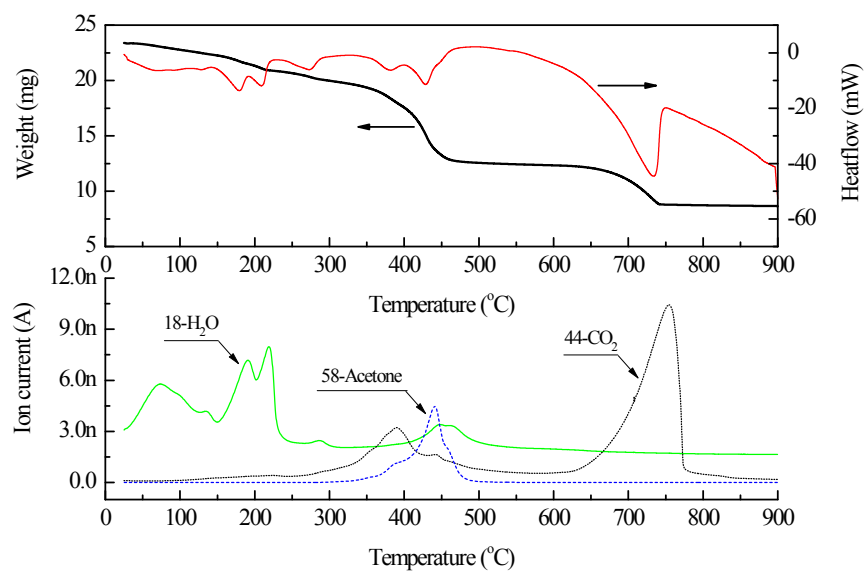

**Fig. S1** N<sub>2</sub>-TPD profile with simultaneous heatflow and MS signal of freshly dried material 3M-2h-1:10.

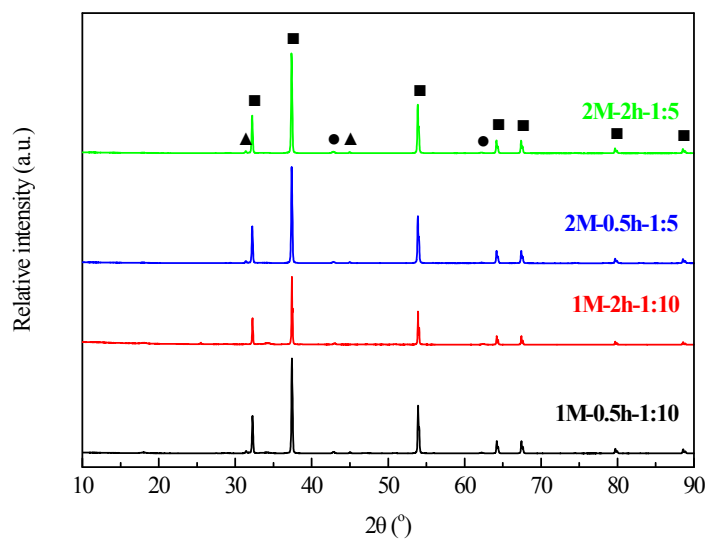

**Fig. S2** XRD patterns of freshly calcined CaO-based CO<sub>2</sub> sorbents derived under the same (low) mass ratio of acetic acid to steel slag. The following phases were identified: (■) lime, CaO; (●) periclase, MgO; (▲) calcium sulphide, CaS.
